RESEARCH ARTICLE

# Readiness to the privatization of the health system in Saudi Arabia: Translation and factor analysis of Readiness to Organizational change (ROC) scale

Ahmed Ali Alasiri<sup>1,2\*</sup>, Qi Zhang<sup>2</sup>

**1** Public Health Department, College of Health Sciences, Saudi Electronic University, Riyadh, Saudi Arabia, **2** Health Science College, Health Science Research, Old Dominion University, Norfolk, Virginia, United States of America

\* [alasiri.ahmed@outlook.com](mailto:alasiri.ahmed@outlook.com)

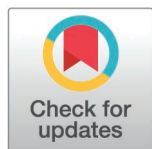

**OPEN ACCESS**

**Citation:** Alasiri AA, Zhang Q (2025) Readiness to the privatization of the health system in Saudi Arabia: Translation and factor analysis of Readiness to Organizational change (ROC) scale. PLoS One 20(6): e0322406. <https://doi.org/10.1371/journal.pone.0322406>

**Editor:** Maher Abdelraheim Titi, King Saud University Medical City, SAUDI ARABIA

**Received:** September 19, 2024

**Accepted:** April 27, 2025

**Published:** June 2, 2025

**Copyright:** © 2025 Alasiri, Zhang. This is an open access article distributed under the terms of the [Creative Commons Attribution License](https://creativecommons.org/licenses/by/4.0/), which permits unrestricted use, distribution, and reproduction in any medium, provided the original author and source are credited.

**Data availability statement:** There are ethical restrictions on sharing the de-identified dataset because it contains sensitive and potentially identifiable information about participants. These restrictions were imposed by the IRB of the Ministry of Health in Saudi Arabia to protect participant confidentiality and privacy. Data

## Abstract

### Background

The Kingdom of Saudi Arabia (KSA) began a major transformation as a part of vision 2030 for its health system. These reform initiatives aim to privatize health services and improve efficiency. Despite this meaningful change, there is a knowledge gap in how healthcare providers prepare for or perceive this shift. Specifically, there has been a lack of validation of Arabic instruments that gauge the individual readiness to this change. This study bridges the gap by localizing and validating the Readiness to Organizational Change scale (ROC) to provide empirical evidence and to understand adaptability for the KSA context.

### Method

The study aimed to test and validate a tool that can be used to assess the ability of individuals to embrace the change initiatives among healthcare providers. A cross-sectional study was conducted in a public healthcare setting that included allied healthcare providers and physicians and excluded the administration staff. Ethical approval was obtained, and the questionnaire was distributed among participants electronically.

### Result

There were 296 participants who completed the survey, with (78.0%) being male and they were between 25–35 years old, while the females represented (22%). The majority had less than 10 years' experience and were married (88.2%). The face and content validity showed an excellent result for Arabic context S-CVI/AVE = 0.97. The inter-item correlation revealed a significant value ( $p < 0.001$ ), which confirmed

access requests can be sent to: Ministry of Health IRB – Saudi Arabia Email: [rec-asear@moh.gov.sa](mailto:rec-asear@moh.gov.sa).

**Funding:** The author(s) received no specific funding for this work.

**Competing interests:** The authors have declared that no competing interests exist.

convergent validity, and Factor analysis assessed the adequacy of sampling (KMO=0.77). The Exploratory Factor Analysis (EFA) extracted seven factors describing 74.6% of the total Variance, with an adequate value of commonalities for most items.

## Conclusion

The Arabic version of ROC is a valid and reliable scale for assessing readiness among healthcare providers in the context of KSA. This translated version can provide insightful information and facilitate the transition of the health system in KSA and achieve the healthcare vision of 2030.

## Introduction

The healthcare industry is a dynamic and challenging environment for professionals delivering high-quality health services. Hospitals are constantly exposure to new information, diverse care styles, governmental structures, rules and regulations, and the introduction of technologies [1]. Health organizations or hospitals also encounter other transformative events, often involving behavioral and social changes for health staff [2]. However, change initiatives in the healthcare industry have shown limited success in implementation [3]. Understanding the level of readiness among employees is a vital part of healthcare setting transformation [4]. There are several definitions and scales used to gauge readiness for change [5]. However, readiness to change is a multidimensional construct that affects beliefs among team members regarding their ability to change, the leader's commitment to change, the benefits expected from the change for employees, and the appropriateness of the change for the organization [6]. Readiness to organizational change is one of the most prevalent attitude studies in the literature on organizational change, and considerable effort is being made to develop instruments to evaluate readiness dimensions [7,8]. Several existing measures focus on the organizational change phenomenon, such as ORIC [4]. This report focuses on the individual level because the individual is the first layer to accept or reject change activities, and only the individual of organization can forecast the success of the initiatives for change through their act [9]. The supra level represents the collective attitude toward change, which essentially includes individuals. While the healthcare system is undergoing a privatization shift in Saudi Arabia and the Ministry of Health initiated a transformation plan for its health system to ensure sustainability for its population [10], there is no valid scale in the Saudi context that measures the individual readiness to change. Also, the validation is context dependent [7]. Therefore, there is a need to bridge the gap in measurement that addresses readiness levels among healthcare teams. Holt et al. developed a readiness to change scale that addresses change at the individual level. The scale is grounded in a framework, undergoes psychometric testing, and is applicable in a healthcare setting [11]. The scale consists of four main constructs with 25 questions: appropriateness (10 items) – whether the healthcare team considers the change

appropriate for their hospital or not; change efficacy (6 items) – the ability of team members to handle the change; management support (6 items) – the support provided by hospital leaders for the healthcare team to implement the proposed change; and personal valence (3 items) – the personal benefits of the proposed change. Furthermore, the ROC scale has been tested and applied in different countries and settings [12,13], and the scale showed a superior rate among other scales for individual readiness due to its rigorous psychometric test and applicability in various settings [6,7,11]. Since the healthcare system in Saudi Arabia is undergoing a significant health transformation [10], measuring the readiness level using a reliable and valid scale will support the success of the change and facilitate the process of achieving the strategic goals of the Ministry of Health in the kingdom. Additionally, the translated version might serve as a first step for each department in a health organization, whether big or small, planning to update its policy or introduce new services or information. Also, it will illustrate the factors that hinder change efforts by health authorities through an understating of the four main constructs of the Holt formwork. This report aims to examine the Arabic version of the readiness to change scale developed by Holt, and the validity and reliability of the version will be assessed in a hospital setting. Arabic language is one of the most spoken languages globally in more than 18 countries and around 400 million people [14].

## Methods

### Participants and procedure

The study was conducted in the general hospital in the Asser region of Saudi Arabia. The study included physicians and allied health providers. Healthcare providers were involved if they had an active practicing license aged 18 years or older, and there were no restrictions on gender and nationality; however, the report excluded health administration staff since this main goal was to assess the frontline of health providers. The study utilized a cross-sectional study. The directorate of health affairs in the Asser region granted ethical approval to IRB log No: REC-2-7-2023. The instrument was piloted to 10 healthcare providers to ensure the sustainability of each item. The pre-test used a self-administrated method, and the researcher included a personal phone number in case there were misleading items or questions that participants misunderstood. The invitation letter included a study aim with a summary of the study. Also, it involved information about voluntary participation in the study, with the right to withdraw at any time. The participants have the option either to “agree” or “disagree” to participate, so when they agree that will be considered as authorization to contribute to this project. The survey didn’t intend to include any medical intervention, so a waiver for formal consent from the IRB was requested. The members of the organization are identified by the employee list provided by the manager of the hospitals. The questionnaires were managed electronically through Google Forms, and the link was sent via social applications. The link was available for six months (01/December/2023–31/Ma/ 2024), and a reminder message was sent every two weeks to encourage health employees to participate.

### Measures

The readiness to organizational change (ROC) instrument contains 25 items and four main dimensions developed by Hot et al. to gauge the readiness at the individual level within organization [11]. The scale was slightly modified to be a 5-Likert scale instead of the 7-Likert scale, in which (1= strongly disagree and 5= strongly agree). The 5- Likert scale was used for several purposes: to increase the number of responses and encourage participants to complete the survey. It is easier to understand by responding, and it eliminates missing some items [15]. To make analysis easier, we classified and sorted the elements based on their domain.

### Translation

The original version of the ROC is in the English language [6], so the version was translated into standard Arabic language using the Squires et al. framework [16]. The process of translation includes four main steps and is illustrated

in Fig 1. First, the qualifying bilingual was translated the English version to the Arabic version. Secondly, The Arabic version was translated back to the English language. The Third step was to give the two versions of English and Arabic to the Billanuge experts to examine the accuracy. The experts checked them independently, and they discussed the findings if they any discrepancies between the two versions by comparing them. In the final step, the version was assessed, and it was found to be valid, and it has identical meaning to the English version.

### Statistical analysis

Three types of validity tests were included to investigate the validation of Arabic version of the ROC. First, four health-care providers (two physicians and two nurses) met to review the translation version of the ROC scale and made their decision about the most suitable translation version. Second, Content validity was obtained by four professional panels who are experts in validating behavior scales in the Arabic context. They assessed if the translated version fit the Arabic culture, and they evaluated if the format of each item was conceptually similar to the English version by following two steps [17]. First, a four-point Likert scale was utilized to test the cultural relevance (which 1 = not relevant and 4 = highly relevant). Secondly, the binary yes and no answers assessed whether each item of the Arabic version was equivalent to the original version. The second validation is content validity indexed (CVI) score were computed for culture relevance and equivalency of the scale. Third, the inter-item correlation was utilized to test the construct validity [18], so the Pearson correlation for each item will be assessed, and the value between 0.3 to 0.49 is considered a moderate correlation, and the value of > 0.5 indicates a strong value [19]. Furthermore, Exploratory factor analysis (EFA) was employed in this study to test the dataset and provide additional insight [13]. Therefore, the initial two steps of the factor analysis were conducted: a) assessment of the suitability of the data and b) factor extraction. The suitability of the data for the (EFA), Kaiser-Meyer-Olkin value (KMO), and Bartlett's Sphericity Test were applied [20]. Factor extraction with the Principal Component Analysis (PCA) utilized to obtain the minimum factors needed to represent the data set effectively, it followed by orthogonal factor rotation as an extraction method [21]. Lastly, to examine the reliability of each of the subscales, Cronbach alpha ( $\alpha$ ) was conducted to assist the internal consistency. The Cronbach alpha ( $\alpha$ ) value ranges from 0 to 1, and since there is no global accepted range for reliability, the study will take the alpha value of 0.7 and above as accepted value [22]. IBM SPSS statistics software version 27.0. was used for analysis (Armonk, New York, USA) [23].

## Results

### Characteristics of participants

The sociodemographic characteristics of the study participants (N=296) are summarized in Table 1. The sample was predominantly male, with 78.0% (n=231) identifying as such, while females constituted 22.0% (n=65) of the participants. Age distribution showed that nearly half of the respondents were between 25 and 35 years old (44.3%, n=131). This was followed by those aged 36–45 years (35.5%, n=105), 46–55 years (15.9%, n=47), and more than 56 years (4.4%, n=13). Notably, there were no participants under the age of 25. Marital status revealed that a significant majority were married (88.2%, n=261), with smaller proportions being single (8.4%, n=25) or divorced (3.4%, n=10).

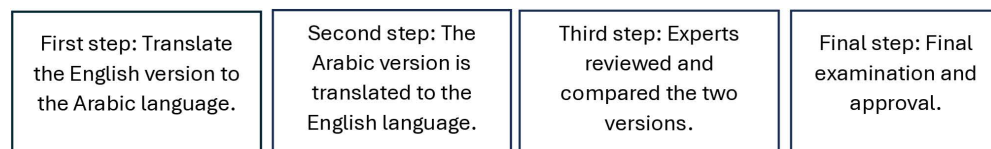

**Fig 1. Visual summary of the four-step translation process used to develop the Arabic version of the scale.** The bilingual experts agreed on the final version, which was used for the pilot study. Original and translated version (S1 Table).

<https://doi.org/10.1371/journal.pone.0322406.g001>

In terms of professional specialty, 22.6% (n=67) of the participants were physicians, while a substantial 77.4% (n=229) were allied healthcare providers. The nationality of the participants was predominantly Saudi, with 93.6% (n=277) identifying as such and 6.4% (n=19) being non-Saudi. Regarding the level of education, the sample included individuals with diverse educational backgrounds: 38.5% (n=114) had a diploma, 34.8% (n=103) held a bachelor's degree, 4.1% (n=12) had a master's degree, and 22.6% (n=67) possessed a doctorate. The distribution of years of experience among participants showed that 12.2% (n=36) had less than 5 years of experience, 32.4% (n=96) had 5–10 years, 23.0% (n=68) had 11–15 years, 19.6% (n=58) had 16–20 years, 2.4% (n=7) had 21–25 years, and 10.5% (n=31) had more than 25 years of experience.

### Questionnaires validation

We conducted descriptive analysis for each item of the scale for the total number of participants, 291. The mean value ranged from 3.25 to 3.79, and the range of the standard deviation was from 0.77 to 1.73. [Table 2](#) showed the item description and communalities for all items were above the threshold of the 0.50, indicating a good proportion of the Variance among the items.

### Face and content validity

The result of the meeting for face validity between physicians and nurses revealed some minor changes to improve the readability of the overall of scale. The recommendation of the team was to produce a final version. The content validity Score showed an adequate level of cultural relevance, and the overall S-CVI/AVE of the translated version was excellent 0.97. Therefore, all items of the final translated versions were utilized to assess readiness among healthcare providers. ([S2 Table](#)).

**Table 1. Sociodemographic variables (N=296).**

|                                      |                            | Count | %     |
|--------------------------------------|----------------------------|-------|-------|
| Gender                               | Male                       | 231   | 78.0% |
|                                      | Female                     | 65    | 22.0% |
| Age                                  | 25–35 years                | 131   | 44.3% |
|                                      | 36–45 years                | 105   | 35.5% |
|                                      | 46–55 years                | 47    | 15.9% |
|                                      | More than 56 years         | 13    | 4.4%  |
|                                      |                            |       |       |
| Marital Status                       | Single                     | 25    | 8.4%  |
|                                      | Married                    | 261   | 88.2% |
|                                      | Divorced                   | 10    | 3.4%  |
| Professional Speciality (Occupation) | Physician                  | 67    | 22.6% |
|                                      | Allied Healthcare Provider | 229   | 77.4% |
| Nationality                          | Saudi                      | 277   | 93.6% |
|                                      | Non-Saudi                  | 19    | 6.4%  |
| Level of Education                   | Diploma                    | 114   | 38.5% |
|                                      | Bachelor's degree          | 103   | 34.8% |
|                                      | Master's degree            | 12    | 4.1%  |
|                                      | Doctorate degree           | 67    | 22.6% |
| Years of Experience                  | Less than 5 years          | 36    | 12.2% |
|                                      | 5-10 years                 | 96    | 32.4% |
|                                      | 11-15 years                | 68    | 23.0% |
|                                      | 16-20 years                | 58    | 19.6% |
|                                      | 21-25 years                | 7     | 2.4%  |
|                                      | More than 25 years         | 31    | 10.5% |

<https://doi.org/10.1371/journal.pone.0322406.t001>

**Table 2. Descriptive of ROC items and communities.**

| Variables |                                     | Mean score (SD) | Communities |
|-----------|-------------------------------------|-----------------|-------------|
| Item      | <b>Appropriateness Construct</b>    |                 |             |
| Q1        |                                     | 3.64±1.73       | 0.803       |
| Q2        |                                     | 3.67±1.20       | 0.894       |
| Q3        |                                     | 3.53±1.18       | 0.884       |
| Q4        |                                     | 3.42±1.08       | 0.765       |
| Q5        |                                     | 3.56±1.06       | 0.834       |
| Q6        |                                     | 3.29±0.99       | 0.624       |
| Q7        |                                     | 3.54±1.03       | 0.712       |
| Q8        |                                     | 3.52±1.15       | 0.734       |
| Q9        |                                     | 3.27±1.50       | 0.778       |
| Q10       |                                     | 3.25±0.97       | 0.776       |
| Item      | <b>Management Support Construct</b> |                 |             |
| Q1        |                                     | 3.56±0.77       | 0.803       |
| Q2        |                                     | 3.29±0.93       | 0.602       |
| Q3        |                                     | 3.33±0.99       | 0.799       |
| Q4        |                                     | 3.60±1.10       | 0.795       |
| Q5        |                                     | 3.37±0.95       | 0.743       |
| Q6        |                                     | 3.56±1.10       | 0.822       |
| Item      | <b>Change Efficacy Construct</b>    |                 |             |
| Q1        |                                     | 3.45±0.91       | 0.633       |
| Q2        |                                     | 3.36±1.03       | 0.657       |
| Q3        |                                     | 3.69±0.94       | 0.577       |
| Q4        |                                     | 3.30±1.12       | 0.671       |
| Q5        |                                     | 3.46±1.04       | 0.762       |
| Q6        |                                     | 3.79±0.91       | 0.821       |
| Item      | <b>Personal Valance Construct</b>   |                 |             |
| Q1        |                                     | 3.26±0.93       | 0.621       |
| Q2        |                                     | 3.25±1.03       | 0.813       |
| Q3        |                                     | 3.25±0.85       | 0.659       |

<https://doi.org/10.1371/journal.pone.0322406.t002>

### Convergent validity

The inter-item correlation for the subscale was significant at ( $p < 0.001$ ). Likewise, the Pearson correlation value for most items showed a strong value, exceeding 0.5. Therefore, the four constructs of the ROC are valid ([S3 Table](#)).

### Exploratory factor analysis

To test the adequacy of the data, the output of the Kaiser-Meyer-Olkin ( $KMO = 0.77$ ) and Bartlett's Test of Sphericity ( $X^2 = 539.266$ ,  $p < 0.000$ ), as shown in [Table 3](#) which confirmed that the data are suitable for EFA.

### Factor extraction

Kaiser's criterion is employed to determine initial unrotated components that need to be extracted. [Table 4](#) shows the total Variance explained by the extracted factors. Prior to the extraction, twenty-five items are revealed from the data set, and after extraction, there are seven factors. They explained a cumulative variance of 74.61. The Principal Component Analysis method is the extraction technique used in this study with the varimax rotation. The first component showed 29.8% of the

**Table 3. KMO and Bartlett's Test.**

|                                                         |                    |             |
|---------------------------------------------------------|--------------------|-------------|
| <b>Kaiser-Meyer-Olkin Measure of Sampling Adequacy.</b> |                    | <b>.775</b> |
| Bartlett's Test of Sphericity                           | Approx. Chi-Square | 5395.266    |
|                                                         | df                 | 300         |
|                                                         | Sig.               | <.001       |

<https://doi.org/10.1371/journal.pone.0322406.t003>

**Table 4. The eigenvalues and Total Variance Explained.**

| <b>Total Variance Explained</b> |                     |               |              |                                     |               |              |
|---------------------------------|---------------------|---------------|--------------|-------------------------------------|---------------|--------------|
| Factor                          | Initial Eigenvalues |               |              | Extraction Sums of Squared Loadings |               |              |
|                                 | Total               | % of Variance | Cumulative % | Total                               | % of Variance | Cumulative % |
| 1                               | 7.718               | 30.870        | 30.870       | 7.468                               | 29.873        | 29.873       |
| 2                               | 3.404               | 13.615        | 44.486       | 3.005                               | 12.020        | 41.893       |
| 3                               | 2.430               | 9.719         | 54.205       | 2.113                               | 8.453         | 50.346       |
| 4                               | 1.698               | 6.791         | 60.995       | 1.299                               | 5.198         | 55.544       |
| 5                               | 1.264               | 5.056         | 66.051       | .919                                | 3.675         | 59.219       |
| 6                               | 1.101               | 4.405         | 70.456       | .751                                | 3.004         | 62.223       |
| 7                               | 1.039               | 4.155         | 74.611       | .641                                | 2.564         | 64.787       |
| 8                               | .838                | 3.352         | 77.963       |                                     |               |              |
| 9                               | .737                | 2.948         | 80.910       |                                     |               |              |
| 10                              | .690                | 2.761         | 83.671       |                                     |               |              |
| 11                              | .623                | 2.490         | 86.162       |                                     |               |              |
| 12                              | .535                | 2.139         | 88.300       |                                     |               |              |
| 13                              | .492                | 1.970         | 90.270       |                                     |               |              |
| 14                              | .421                | 1.683         | 91.953       |                                     |               |              |
| 15                              | .354                | 1.417         | 93.371       |                                     |               |              |
| 16                              | .317                | 1.268         | 94.639       |                                     |               |              |
| 17                              | .268                | 1.071         | 95.710       |                                     |               |              |
| 18                              | .250                | 1.000         | 96.710       |                                     |               |              |
| 19                              | .206                | .826          | 97.535       |                                     |               |              |
| 20                              | .166                | .665          | 98.200       |                                     |               |              |
| 21                              | .134                | .536          | 98.735       |                                     |               |              |
| 22                              | .120                | .479          | 99.214       |                                     |               |              |
| 23                              | .090                | .359          | 99.574       |                                     |               |              |
| 24                              | .067                | .268          | 99.842       |                                     |               |              |
| 25                              | .040                | .158          | 100.000      |                                     |               |              |

Extraction Method: Principal Component Factoring.

<https://doi.org/10.1371/journal.pone.0322406.t004>

total Variance and an eigenvalue of 7.7. The second component has explained 12.02 of the variances with 3.4 eigenvalues. The component third to seven have shown lower than 10% of total Variance for each of them. Specifically, they explained 8.45%, 5.19%, 3.67%, 3.00%, and 2.56% of the Variance, respectively, with eigenvalues ranging from 2.43 to 1.03.

**Reliability**

The overall internal consistency of the scale was 0.85. [Table 5](#) summarizes the reliability of the four constructs of the ROC scale, indicating the number of items in each scale and their respective Cronbach's alpha coefficients.

**Table 5. Reliability of Scales.**

| Scale              | Number of items | Cronbach's Alpha |
|--------------------|-----------------|------------------|
| Appropriateness    | 10              | 0.781            |
| Personal Valence   | 3               | 0.752            |
| Management Support | 6               | 0.773            |
| Change Efficacy    | 6               | 0.698            |

<https://doi.org/10.1371/journal.pone.0322406.t005>

## Discussion

While the attitude of the individual to change is a major reason for the failure of change initiatives [24,25] however, to the best of our knowledge, there are no studies in the KSA that tackle the individual readiness for the adoption of privatization and healthcare transformation. The present paper attempts to bridge the knowledge gap and provide a translated instrument to examine the ability of individuals to change. Individuals in an organization are a main component and will provide valuable preliminary data for the policymakers. The main aim of the study was to psychometric test the Arabic version of the ROC scale among healthcare providers in KSA. The study evaluated several types of validity, including face and content validity, and to establish convergent validity, the (EFA) was done. Additionally, the reliability of the scale was evaluated using Cronbach's alpha. Based on our results, the Arabic version has similar outcomes to the original English version [11]. VI technical utilized in this study, however, as best to our knowledge, is one of the strengths points of our study since the CVI has not been employed in any psychometric research testing the properties of ROC. The CVI confirmed that the translated version has equivalent and semantically meaning to the original English version. The internal consistency value was high for appropriateness  $\alpha=0.78$ , Management support  $\alpha=0.77$ , and personal value  $\alpha=0.75$  however only change efficacy dimensions was slightly low  $\alpha=0.69$ . The original version of ROC showed a higher  $\alpha$  value for appropriateness  $\alpha=0.94$ , management support  $\alpha=.087$ , change efficacy  $\alpha=0.82$ , and only personal value was  $\alpha=0.066$ . which is similar to the study that evaluated the readiness to the new indicator of quality and safety among health care providers in the primary health center, the value of Cronbach alpha was over the threshold for all dimensions except the personal value was  $\alpha=0.66$  [26]. Similarly to the study that tested the readiness among clinical providers and non-clinical in Australia to the hospital redevelopment, they included two dimensions, appropriateness, and change efficacy; the value was  $\alpha=0.85$  and  $0.75$ , respectively [12]. The validation of the Arabic version has significant implications for the healthcare sector in the KSA since the health system is under transformation to enhance the delivery of health, so this scale can help the administration member in the health cluster or at the hospital level either big or small to identify area of the resistance and to enable tailored change management strategy. While the overall reliability is over the threshold of 0.7, further research on refining the change efficacy construct could improve its consistency value. Also, this study was conducted in only one health center, so further validation research would enhance the generalizability in the Saudi health context. Additionally, based on the fact that we used the standard Arabic translation, the translated version should be understood, and it can be utilized in any Arabic country.

## Conclusion

The study demonstrates strong validity and reliability for the Arabic version of the ROC, making it a valuable tool for evaluating readiness among individuals in healthcare settings. Consequently, policymakers could find it practical and helpful to test the individual ability to change and tailor change strategies. It will provide insightful information for the leader that supports the overall goal of Vision 2030 for the health system and contribute to the long-term success of the change initiatives. Similarly, the Arabic version can aid the significant transformation of the organization by identifying approaches to help minimize the disruption and provide quality health services to patients.

## Supporting information

### S1 Table. The original English and Arabic versions of the ROC questionnaire.

(PDF)

### S2 Table. Content Validity Index CVI.

(PDF)

### S3 Table. Inter-Item correlation of translated version of ROC.

(PDF)

## Author contributions

**Conceptualization:** Ahmed Ali Alasiri.

**Data curation:** Ahmed Ali Alasiri.

**Formal analysis:** Ahmed Ali Alasiri.

**Investigation:** Ahmed Ali Alasiri.

**Methodology:** Ahmed Ali Alasiri.

**Supervision:** Qi Zhang.

**Writing – original draft:** Ahmed Ali Alasiri.

**Writing – review & editing:** Ahmed Ali Alasiri.

## References

1. Light D. Institutional change and healthcare organizations: From professional dominance to managed care. *Am J Sociol.* 2001;106(5):1488–9.
2. Pomare C, Churruca K, Long JC, Ellis LA, Braithwaite J. Organisational change in hospitals: A qualitative case-study of staff perspectives. Vol. 19, *BMC Health Services Research.* BioMed Central Ltd.; 2019.
3. Shortell SM, Bennett CL, Byck GR. Assessing the impact of continuous quality improvement on clinical practice: what it will take to accelerate progress. *Milbank Q.* 1998;76(4):593–624.
4. Shea CM, Jacobs SR, Esserman DA, Bruce K, Weiner BJ. Organizational readiness for implementing change: a psychometric assessment of a new measure. *Implement Sci.* 2014;9:7. <https://doi.org/10.1186/1748-5908-9-7> PMID: [24410955](https://pubmed.ncbi.nlm.nih.gov/24410955/)
5. Weiner BJ, Amick H, Lee S-YD. Conceptualization and measurement of organizational readiness for change: a review of the literature in health services research and other fields. *Med Care Res Rev.* 2008;65(4):379–436. <https://doi.org/10.1177/1077558708317802> PMID: [18511812](https://pubmed.ncbi.nlm.nih.gov/18511812/)
6. Holt D, Armenakis A, Harris S, Feild H. Toward a Comprehensive Definition of Readiness for Change: A Review of Research and Instrumentation. *Research in Organizational Change and Development.* 2007;16:289–336. [https://doi.org/10.1016/s0897-3016\(06\)16009-7](https://doi.org/10.1016/s0897-3016(06)16009-7)
7. Holt DT, Helfrich CD, Hall CG, Weiner BJ. Are you ready? How health professionals can comprehensively conceptualize readiness for change. *J Gen Intern Med.* 2010;25(Suppl 1):50.
8. Puchalski Ritchie LM, Straus SE. Assessing Organizational Readiness for Change Comment on “Development and Content Validation of a Trans-cultural Instrument to Assess Organizational Readiness for Knowledge Translation in Healthcare Organizations: The OR4KT”. *Int J Health Policy Manag.* 2019;8(1):55–7. <https://doi.org/10.15171/ijhpm.2018.101> PMID: [30709104](https://pubmed.ncbi.nlm.nih.gov/30709104/)
9. Jennifer M. George GRJ. Towards a Process Model of Individual Change in Organizations. SAGE [Internet]. 2001 [cited 2022 Oct 27]. Available from: [https://journals.sagepub.com/doi/abs/10.1177/0018726701544002?casa\\_token=5FjZwb5Qz3cAAAAA:aW6mnmqHNcmwIzTnxPJbafdJpaOA-qwVRyEdIU1aMLzjmg1i8iqo6TeyC-TLJrEXENeenKXP2sGQ](https://journals.sagepub.com/doi/abs/10.1177/0018726701544002?casa_token=5FjZwb5Qz3cAAAAA:aW6mnmqHNcmwIzTnxPJbafdJpaOA-qwVRyEdIU1aMLzjmg1i8iqo6TeyC-TLJrEXENeenKXP2sGQ)
10. Alasiri AA, Mohammed V. Healthcare Transformation in Saudi Arabia: An Overview Since the Launch of Vision 2030. *Health Serv Insights.* 2022;15:11786329221121214. <https://doi.org/10.1177/11786329221121214> PMID: [36081830](https://pubmed.ncbi.nlm.nih.gov/36081830/)
11. Holt DT, Armenakis AA, Feild HS, Harris SG. Readiness for Organizational Change. *The Journal of Applied Behavioral Science.* 2007;43(2):232–55. <https://doi.org/10.1177/0021886306295295>
12. Pomare C, Ellis L, Long J, Churruca K, Tran Y, Braithwaite J. Are you ready? Validation of the hospital change readiness (HCR) questionnaire. *BMJ Open.* 10(8).
13. Çalıřkan Ö. Readiness for organizational change scale: validity and reliability study. *Educ Admin Theory Pract.* 2019;25(4).

14. Campbell-Wilson F. Middle east and arab american cultures. *Communication Disorders in Multicultural and International Populations*. Elsevier. 2012. p. 61–75. <https://doi.org/10.1016/b978-0-323-06699-0.00013-3>
15. Allen I, Seaman C. Likert Scales and Data Analyses [Internet]. 2007. Available from: [www.sloan-c.org](http://www.sloan-c.org)
16. Squires A, Aiken LH, van den Heede K, Sermeus W, Bruyneel L, Lindqvist R, et al. A systematic survey instrument translation process for multi-country, comparative health workforce studies. *Int J Nurs Stud*. 2013;50(2):264–73. <https://doi.org/10.1016/j.ijnurstu.2012.02.015> PMID: [22445444](https://pubmed.ncbi.nlm.nih.gov/22445444/)
17. Polit F. Is the CVI an acceptable indicator of content validity? *J Chem Inf Model*. 2013;53(9).
18. Raharjanti N, Wiguna T, Purwadianto A, Soemantri D, Indriatmi W, Poerwandari E. Translation, validity and reliability of decision style scale in forensic psychiatric setting in Indonesia. *Heliyon*. 2022;8(7).
19. Taan S, Hajjar E. Statistical analysis: Internal-consistency reliability and construct validity. *Int J Quantitative Qualitative Res Methods*. 2018;6(1):46–57.
20. Shrestha N. Factor analysis as a tool for survey analysis. *Am J Appl Math Stat*. 2021;9(1).
21. Samuels P. Advice on exploratory factor analysis. Centre for Academic Success, Birmingham City University. 2016.
22. Tavakol M, Dennick R. Making sense of Cronbach's alpha. *Int J Med Educ*. 2011;2:53–5.
23. Armonk NY. IBM Corp. Released 2020. IBM SPSS Statistics for Windows, Version 27.0. Armonk (NY): IBM Corp. Google Search; 2020.
24. Sandell R, Janes RR. Leading Change: Why transformation efforts fail. 2007 Apr 11 [cited 2025 Mar 19];20–9. Available from: <https://www.taylor-francis.com/chapters/edit/10.4324/9780203964194-4/leading-change-john-kotter>
25. Washington M, Hacker M. Why change fails: knowledge counts. *Leadership & Organization Development Journal*. 2005;26(5):400–11. <https://doi.org/10.1108/01437730510607880>
26. Alameddine M, Saleh S, Natafqi N. Assessing health-care providers' readiness for reporting quality and patient safety indicators at primary health-care centres in Lebanon: a national cross-sectional survey. *BMC Health Serv Res*. 2015.
